# Supplementary material
Source: PubMed Central journal article supplement (PMC5021581)
Supplement: NIHMS799930-supplement-Supp_Info.pdf [file NIHMS799930-supplement-Supp_Info.pdf]

**SUPPORTING INFORMATION for: Gene duplication and divergence produce diverse MHC genotypes without disassortative mating**

Donald C. Dearborn, Andrea B. Gager, Andrew G. McArthur, Morgan E. Gilmour, Elena Mandzhukova, & Robert A. Mauck

**SUPPLEMENTAL LITERATURE REVIEW**

**MHC-Disassortative Mating and the Monophyly of MHC Loci Assayed**

Based on our empirical data and our phylogenetic model, our study ultimately proposes that MHC-based mating preferences can be shaped by the divergence of duplicated MHC loci. Species vary in their number of MHC loci and in the extent of differentiation between those loci. These differences between species have consequences for natural selection and for sexual selection, but they also pose methodological problems for genotyping and consequently for thinking clearly about how MHC variation might affect the evolution of mating preferences. Here, we summarize the locus-specificity of MHC data from studies of MHC-disassortative mating in other species.

In humans and mice, an extraordinary amount is known about MHC structure and function, including the documentation of gene-specific clades of allele sequences of peptide binding grooves within MHC Class I and Class II in humans and within MHC Class II in mice (Gu & Nei 1999). In humans and in mice there are examples and counterexamples of disassortative mating preferences, along with some disagreements about the relevance of studying mate choice in these species (Havlicek & Roberts 2009; Jordan & Bruford 1998; Penn & Potts 1998; Piertney & Oliver 2006). In the other leading model system of MHC architecture, the chicken (Jacob *et al.* 2000; Kaufman *et al.* 1999; Salomonsen *et al.* 2005), junglefowl show interesting evidence of cryptic choice for MHC-dissimilar mates (Gillingham *et al.* 2009; Løvlie *et al.* 2013) and largely locus-specific divergence of alleles between the major and minor Class I genes (BF locus) but phylogenetic comingling of alleles between the major and minor Class II genes (BLB locus) (Worley *et al.* 2008). Despite locus-specific genotype data in those junglefowl mate choice studies, inheritance of unbroken MHC haplotypes in fowl makes it hard to interpret these studies in relation to our model.

In wilder species of animals, details of MHC structure and function are generally much less clear, and tests of MHC-disassortative mating use widely varying kinds of MHC data. In addition to variation in lab methods (RFLP; DGGE, SSCP, or RSCA, with or without sequencing of exemplars; cloning and Sanger sequencing; high throughput sequencing), studies vary in the number of loci assayed and in whether those assays are locus-specific. Among studies that test for MHC-disassortative mating, 14 studies<sup>1</sup> – predominantly of salmonid fishes but also 2 other fish species, 1 amphibian, 1 bird, and 3 mammals – examined exactly one MHC locus, with 7 of those datasets finding evidence for MHC-disassortative mating. In contrast, the vast and increasing majority of studies that test for MHC-disassortative mating use PCR primers that unresolvably amplify multiple loci. In 27 datasets of 21 species<sup>2</sup> – including 2 fish species, 2 reptiles, 10 birds, and 7 mammals – researchers generated data simultaneously from multiple MHC loci with lab methods that prevented the assignment of alleles to loci. Roughly half of these studies found evidence of disassortative mating, and half did not. Unfortunately, most such studies can only hypothesize about the number of loci being amplified, and

46 many also lack confirmation of expression. Aside from the present work on Leach's storm-petrels,  
only one study has examined multiple MHC loci with locus-specific data (Huchard *et al.* 2013).

48 Two points arise from this overview of the literature. First, our study is fairly unique among wild  
animal studies, in testing MHC-disassortative mating with locus-specific data from multiple MHC loci.  
50 Second, the current state of the field makes it hard to test the generality of our model. Outside of  
salmonid fishes, most systems for studying MHC-disassortative mate choice do indeed have multiple  
52 loci. However, the extent of divergence between the alleles of duplicate loci cannot be assessed in  
those wild animal studies, because the lab methods used cannot assign alleles to particular loci. This  
54 situation was actually forecast and lamented a decade ago (Piertney & Oliver 2006) and will likely be  
exacerbated by continued advances in high throughput sequencing.

56 <sup>1</sup>Tests of MHC-disassortative mating with single-locus MHC data: (Agbali *et al.* 2010; Bahr *et al.* 2012;  
58 Bos *et al.* 2009; Cutrera *et al.* 2012; Evans *et al.* 2012; Evans *et al.* 2013; Forsberg *et al.* 2007; Knafler  
*et al.* 2012; Landry *et al.* 2001; Lenz *et al.* 2013; Neff *et al.* 2008; Sommer 2005; Yeates *et al.* 2009)

60 <sup>2</sup> Tests of MHC-disassortative mating that simultaneously screen multiple MHC loci without being  
62 able to assign putative alleles to loci: (Aeschlimann *et al.* 2003; Baratti *et al.* 2012; Bichet *et al.* 2014;  
Bonneaud *et al.* 2006; Eizaguirre *et al.* 2009; Ekblom *et al.* 2004; Freeman-Gallant *et al.* 2003;  
64 Huchard *et al.* 2010; Juola & Dearborn 2012; Kalbe *et al.* 2009; Kuduk *et al.* 2014; McCairns *et al.*  
2011; Miller *et al.* 2009; Olsson *et al.* 2003; Radwan *et al.* 2008; Reusch *et al.* 2001; Richardson *et al.*  
66 2005; Roth *et al.* 2014; Schwensow *et al.* 2008a; Schwensow *et al.* 2008b; Sepil *et al.* 2015; Setchell *et al.*  
2010; Sin *et al.* 2015; Strandh *et al.* 2012; Westerdahl 2004; Winternitz *et al.* 2015)

## 68 SUPPLEMENTAL METHODS

### 70 Details of Sex Identification

Because storm-petrels are sexually monomorphic, we assessed the sex of all 222 birds with PCR  
72 primers 2550F and 2718R (Fridolfsson & Ellegren 1999), using 20 µl reactions of 2.0 µl 10x ABI  
Amplitaq Gold 360 buffer, 2.0 µl 25mM MgCl<sub>2</sub>, 2.0 µl 2mM dNTPs, 0.8 µl 10µM each primer, 1.0 µl  
74 ABI 360 G-C enhancer, 7.3 µl water, 0.1 µl Amplitaq Gold polymerase, and 4.0 µl 20 ng/µl DNA.  
Reactions were conducted on a BioRad C1000 thermocycler as follows: 95°C for 10 min; 35 cycles of  
76 95°C for 30 s, 49°C for 60 s, and 72°C for 90 s; and a final 5 min extension at 72°C. In this species,  
amplicons from the Z and W chromosomes differ by 200 bp and are easy to resolve on 1.5% agarose.

### 78 Details of MHC High Throughput Sequencing, Data Processing, and Copy Number Variation

80 Our nested PCR and sequencing have been described in detail (Dearborn *et al.* 2015), but we recap  
here several points that affect data quality. Barcoded versions of forward and reverse PCR primers  
82 for the inner PCR were used in unique combinations for each bird, such that sequence data from a  
library of pooled amplicons could later be demultiplexed. Any two barcodes differed in at least three  
84 positions, reducing the possibility that sequencing error would cause an amplicon sequence to be  
assigned to the wrong bird. On each PCR plate, negative controls were also subjected to  
86 amplification and sequencing protocols. To reduce the risk of chimera formation, we used a

88 minimum number of PCR cycles in the outer and inner PCR reactions, a long extension step to avoid incomplete synthesis, and a hot-start polymerase that lacks proof-reading capability.

90 Amplicons were sequenced in two batches, as part of two different Illumina MiSeq runs using 2x250  
92 bp paired end reads (Jackson Laboratories, Bar Harbor, Maine, and Farncombe Metagenomics  
94 Facility, McMaster University). For each run, a PCR-free Illumina sequencing library was prepared  
96 with either the KAPA HTP Library Preparation Kit (Kapa Biosystems, Wilmington, MA) or TruSeq DNA  
98 PCR-Free Library Preparation Kit (Illumina, San Diego, CA) and an Illumina TruSeq style adapter, with  
100 subsequent quality control performed with an Agilent Technologies 2100 Bioanalyzer and with qPCR.

102 Sequences were trimmed to a length of 200 bp using the FASTX package  
([http://hannonlab.cshl.edu/fastx\\_toolkit/](http://hannonlab.cshl.edu/fastx_toolkit/)) based on an average quality curve value of Q30 at 200bp.  
104 We filtered out sequences that could not be resolved due to missing primer sequence, unrecognized  
106 barcode, sequence ambiguities, or incomplete reads. The trimmed forward and reverse sequences  
108 from the paired end reads were assembled with 111 bp overlap for Ocle-DAB1 and 73 bp overlap for  
110 Ocle-DAB2.

112 Our primary genotyping algorithm was aimed at identifying single-locus genotypes for the two genes,  
114 assuming an absence of copy number variation (see next). Allele coverage within bird and locus  
116 should vary since the sequencing results are the product of pooling of many PCR products, with the  
118 result that a read-depth cutoff is not the best way to distinguish real alleles from sequencing noise.  
120 Instead, our custom genotyping algorithm examined ratios of amplicon read abundance within a bird  
122 at each gene: there should be one or two amplicons with clearly high abundance in homozygotes and  
124 heterozygotes, respectively, with the remainder being sequencing error and low abundance artefacts.  
126 Samples with low coverage or unresolved genotypes were manually inspected, as was a random  
128 sample of 20 algorithm-determined genotypes.

130 Three lines of evidence suggest that copy number variation (CNV) does not occur at high frequency in  
our dataset. First, preliminary Sanger sequencing of uncloned PCR products generally produced either  
clean sequences with single peaks (i.e. homozygotes) or sequences with some double peaks that  
could be created by combination of two sequences from homozygotes. Second, in the 22 parent-  
offspring trios genotyped at both MHC genes, offspring genotypes were consistent with inheritance  
from their parents. If copy number variation was common, individuals should often have more than  
two alleles, in which case our non-CNV genotyping algorithm would identify a random subset of the  
existing alleles. As a result, offspring should periodically have one or more alleles not accounted for  
by the genotypes of their parents. Our data do not show that pattern. Third, in our repeat PCR and  
genotyping of both genes in 39 birds (Dearborn *et al.* 2015), 77 of 78 (98.7%) genotypes that were  
assayed in duplicate yielded identical results. If CNV was widespread, our repeat-genotyping should  
have had poor success, because individuals with additional gene copies would often have more than  
two alleles, and the number of reads of these alleles should by chance sort out in a different order of  
sequencing depth in the two genotyping efforts, resulting in conflicting genotype calls.

130 Nonetheless, the Illumina data do show some birds as having more than two sequences per gene,  
though with unequal numbers of reads of these sequences within a bird. In case this represents CNV

rather than error, we also defined genotypes and tested for mate choice using a genotyping  
 132 algorithm that is permissive to the existence of CNV. For each bird, we retained as alleles all  
 134 sequences that met three criteria: the sequence was also detected as one of the most common two  
 136 sequences in at least one other bird, the reads of the sequence in the bird being genotyped were  
 138 more common than reads of sequencing error in the same bird, and the number of reads of that  
 140 sequence comprised at least 15% of the number of reads of the most common sequence in that bird.  
 142 This last criterion is a permissive expansion of the following expectation: if CNV has resulted in 3  
 144 copies of a gene and if a bird's genotype is as skewed as possible – 5 copies of 1 allele and 1 copy of  
 another – the read depth for the rare allele should be 20% of the read depth of the common allele. If  
 the genotype is anything less skewed (e.g., 4 copies of 1 allele, 2 copies of a second allele, and 2  
 copies of a third allele), there should be a higher ratio of the rarest allele's reads to the most common  
 allele's reads, allowing it to easily pass the 15% cutoff. By these criteria, additional alleles were  
 retained in the genotype calls of 3 of 210 birds (1.4%) at Ocle-DAB1 and in 30 of 210 birds (14.3%) at  
 Ocle-DAB2, resulting in a maximum of 3 and 4 alleles observed per bird at the two genes,  
 respectively.

#### Details of Microsatellite Amplification

148 For paternity analysis and for estimating relatedness between mates, birds were genotyped at 15  
 150 microsatellite loci (Table S1) previously developed for either a different population of this species (12  
 152 loci (Bicknell *et al.* 2011)), a congener (2 loci (Sun *et al.* 2009)), or the zebra finch *Taeniopygia guttata*  
 154 (1 locus (Dawson *et al.* 2010)). Primers were initially screened for amplification success in our lab,  
 and samples were subsequently sent to Ecogenics (Balgach, Switzerland) for multiplex PCR and  
 156 fragment analysis. Samples were amplified in 3 multiplex reactions of 4 to 6 loci each, using  
 158 fluorescently labeled primers. Each 10  $\mu$ l reaction contained 2-10 ng of genomic DNA, 5  $\mu$ l  
 HotStarTaq Master Mix (Qiagen 203445), double distilled water, and 0.3  $\mu$ l of 10 $\mu$ M of each forward  
 and reverse primer. Reactions were conducted on a Techne TC-412 thermocycler as follows: 95°C for  
 15 min; 35 cycles of 94°C for 30 s, 56°C for 90 s, and 72°C for 60 s; and a final 30 min extension at  
 72°C. Sizing was performed on an Applied Biosystems 3730xl DNA Analyzer, with manual verification  
 of allele calls.

#### Power Analysis for MHC-based Mate Choice

162 We found no evidence of preference for mates that were maximally or intermediately disassortative  
 164 at MHC, based on randomization tests of means and variances, respectively. Thus, we estimated the  
 166 statistical power to detect mate choice for amino acid sequence divergence between mates, similar  
 168 to Lenz *et al.* (Lenz *et al.* 2013). For the two-tailed randomization test of means, we paired each  
 170 female with a male chosen randomly without replacement and then increased their MHC divergence  
 away from random by adding a small value,  $x$ . For a given value of  $x$ , we created 1,000 such sets of 94  
 172 pairs and estimated power as the percent of the 1,000 iterations that showed significant  
 disassortative mating when compared against the 97.5<sup>th</sup> percentile of the null distribution used in our  
 original analysis. We then iterated this process over a range of effect sizes by changing the value of  $x$ ,  
 i.e. by changing the mean MHC divergence between randomly assigned pairs (Figure S5a).

174 For the one-tailed randomization test of variances, the aim of the power analysis was to change the  
 effect size by reducing the among-pair variance in MHC divergence between a female and her mate.

176 Here, we paired each female with a male chosen randomly without replacement, and then we shifted  
 178 each pair's female-male MHC divergence towards the mean of all random pairs, by adding or  
 180 subtracting a small value,  $y$ , depending on whether the initial value was below or above the mean.  
 182 For a given value of  $y$ , we created 1,000 sets of 94 pairs and estimated power as the percent of the  
 1,000 iterations that showed significantly smaller variance than the 95<sup>th</sup> percentile of the null  
 distribution used in our original analysis. We then iterated this process over a range of effect sizes by  
 changing the value of  $y$ , thereby changing the variance of randomly assigned pairs around the mean  
 value for randomly assigned pairs (Figure S5b).

#### 184 **Details of Phylogenetic Permutation Model of MHC**

186 *Overview* – The phylogenetic permutation model tested two possible contributors to amino acid  
 188 differences between an individual's alleles. The first hypothesis is that MHC-divergent genotypes are  
 190 generated by monophyly broadly speaking – that is, because the alleles of the two genes are diverged  
 into locus-specific clades. The second hypothesis is that MHC-diverse genotypes are generated by  
 particular divergence between the two common alleles in the population (Ocle-DAB1\*004 and Ocle-  
 DAB2\*0050; Figure 1a).

192 To test these two hypotheses, we used the existing set of alleles from our sample rather than create  
 194 sequences de novo via simulated mutation. Thus, we maintained three key aspects of our system:  
 196 the total number of alleles per locus (11 at Ocle-DAB1 and 13 at Ocle-DAB2), the distribution of allele  
 198 frequencies at each locus, and the structure of the phylogeny. Within that framework, we permuted  
 the alleles (and their associated frequencies) across the phylogeny, which changed the distance  
 between alleles according to their new positions in the phylogeny. The iterative assignment of alleles  
 to new positions in the phylogeny changed iteratively the two factors of interest to us: the extent of  
 monophyly, and the distance between the two most common alleles. We will discuss these in turn.

200 *Monophyly* – The phylogenetic analyses show two clades of 11 and 13 alleles, corresponding to Ocle-  
 202 DAB1 and Ocle-DAB2 (Figures 1a, 2, and S1). When permuting the locations of the alleles within this  
 204 phylogeny, the proportion of a gene's alleles that could fall together into one clade (i.e. monophyly)  
 206 can vary from a low of 0.542 (the smaller clade containing 5 and 6 alleles from Ocle-DAB1 and Ocle-  
 208 DAB2 respectively, and the larger clade containing 6 and 7 alleles from Ocle-DAB1 and Ocle-DAB2) to  
 a high of 1 (all 11 Ocle-DAB1 alleles in the smaller clade, and all 13 Ocle-DAB2 alleles in the larger  
 clade). Including these two extremes, there are 12 possible values for the degree of monophyly in  
 this dataset.

210 *Distance between Common Alleles* – Each gene has a single common allele, Ocle-DAB1\*004 and Ocle-  
 212 DAB2\*0050; these are moderately far apart in the actual phylogeny (Figure 1a, Table S2). In the  
 214 permutation model, these two alleles could be quite near each other in the phylogeny or could be  
 216 very far apart, and this range of possibilities here is largely unconstrained by the degree of  
 monophyly of the full set of alleles; see Figure S5 for examples of permutations that show various  
 combinations of high and low values for monophyly and high and low values for distance between  
 the common alleles.

218 *Permutation and Output* – We randomly permuted the locations of the alleles in the phylogeny,  
 220 writing a set of programs in 4<sup>th</sup> Dimension (4D, Inc; San Jose, CA) to generate stratified permutations  
 222 with 1,000 independent replicates (varying in distance between the two common alleles) for each of  
 224 the 12 possible degrees of monophyly (see examples in [Figure S5](#)). For each of the 12,000  
 226 permutations of the alleles in the phylogeny, we recorded three variables as output: the degree of  
 monophyly; the number of amino acid differences between the permuted locations of the two most  
 common alleles, Ocle-DAB1\*004 and Ocle-DAB2\*0050; and the average MHC diversity in our set of  
 188 individuals, calculated as the average amino acid differences between the 6 pairwise  
 combinations of an individual's 4 alleles.

228 *Downstream Analysis* – We entered the model's output into regression analyses to test the relative  
 230 importance of the two hypotheses. Rather than inflate our sample by using a data point from all  
 232 12,000 permutations, our downstream analysis of model output used the average MHC diversity for  
 234 each value of the predictor variables. The dependent variable was the extent of MHC diversity within  
 236 individuals, measured as the average distance between pairwise comparisons of an individual's  
 238 alleles. Two predictor variables were tested: the extent of monophyly, and the divergence between  
 the most common allele of each gene. The importance of these predictors was tested separately in  
 univariate regressions and then together in a multiple regression. Slopes were calculated as  
 standardized slopes (i.e. the dependent and predictor variables were standardized to a mean of 0 and  
 standard deviation of 1); this has the advantage of allowing the slopes associated with the two  
 predictors to be compared directly, while not altering the significance tests or the model  $R^2$ .

240 In the data used in the multiple regression analysis, there was not a problem with multicollinearity, as  
 242 the degree of monophyly and the distance between the two common alleles were only weakly  
 244 correlated ( $r = 0.096$ ). Even in the unusual situation of perfect monophyly, the distance between the  
 246 two common alleles could range from 8 to 22 amino acids (of 89 codons in exon 2). With any of the  
 248 other degrees of monophyly, the possible range of distances between the two common alleles was  
 even wider, from 1 to 22 amino acids. Consequently, there was ample scope to test for separate  
 effects of monophyly of the genes' alleles and distance between the two common alleles, as reflected  
 in the span of the box plots in [Figure 5](#).

## 250 SUPPLEMENTAL RESULTS

### 251 **Microsatellite Descriptives**

252 We resolved 99.4% of 3,330 single-locus microsatellite genotypes. Per-locus genotyping error rate, as  
 254 estimated by Cervus from 34 mother-offspring pairs, was 0.0100. MICRO-CHECKER found no  
 256 evidence of stutter-based scoring error, large-allele dropout, or null alleles at any of the 15 loci. The  
 258 average Oosterhout null allele frequency across all 15 loci was 0.00152. There was no significant  
 260 genotypic disequilibrium between any pair of microsatellite loci or between microsatellite loci and  
 the MHC genes (all Bonferroni-corrected  $p > 0.05$ ). For the full dataset of 222 birds (188 adults and  
 34 chicks) at 15 loci,  $N_A$  ranged from 3 to 40 alleles per locus (mean = 10.0, median = 6; [Table S1](#)),  
 with mean  $H_E$  across loci of 0.668. In Bonferroni-corrected tests,  $F_{IS}$  was not significantly different  
 from zero for any locus. Overall, the microsatellite genotypes appeared suitable for paternity analysis  
 and for estimating relatedness coefficients between mates.

262

Additional permutation tests of microsatellite data for inbreeding/outbreeding were conducted using Moran's I as a relatedness estimator (Hardy & Vekemans 1999), and this produced equivalent results to those described in the main text (data not shown).

266

### Copy Number Variation

268

As detailed above, the evidence for the existence of copy number variation is somewhat mixed. Data from repeat-genotyping and from parent-offspring analysis suggest that it is rare or absent, but data from Illumina MiSeq catalogs suggest that CNV occurs in 1.4% of birds at Ocle-DAB1 and in 14.3% of birds at Ocle-DAB2. Here we summarize the minor changes in MHC descriptive statistics when genotype determinations are changed from a single-copy algorithm to a CNV-permissive algorithm. In our sample of 188 adults and 22 offspring, the average number of alleles per bird at Ocle-DAB1 and Ocle-DAB2 combined changes from  $3.33 \pm 0.71$  to  $3.56 \pm 0.92$  with the inclusion of putative CNV. Divergence of alleles within individual birds was essentially unaffected: the average difference between each of the unique alleles in an individual changed from  $15.0 \pm 1.28$  to  $14.8 \pm 1.37$  amino acid differences in the 89 codons of exon 2. Lastly, MHC similarity between mates changed little when including putative CNV alleles: mean allele sharing changed from 41.3% to 41.6%, and the average number of amino acid differences changed from  $12.1 \pm 1.59$  (range 7.5 to 17.1) to  $12.3 \pm 1.52$  (range 7.5 to 17.3). Overall, using a genotyping protocol that accommodates putative CNV has little impact on MHC diversity and similarity in our population.

282

We also tested for MHC-disassortative mating using these genotypes that allowed for copy number variation. This approach to determining genotypes necessarily resulted in different birds having different numbers of alleles, and an inability to determine the number of copies of each allele. Therefore we collapsed each bird's genotype to a simple list, in this case yielding one to four unique alleles per bird at each of Ocle-DAB1 and Ocle-DAB2 and a total of 2 to 6 alleles per bird. We then conducted mate choice randomization tests based on four different metrics of MHC divergence. In these analyses, there was no evidence for non-random mating with respect to mean MHC divergence, and the trends for variance were in the wrong direction (i.e., towards more variance from one mated pair to another, rather than towards all mated pairs exhibiting a similar level of male-female MHC dissimilarity). This was true of (1) allele sharing ( $p = 0.836$  for mean,  $p = 0.768$  for variance), (2) p-distance at all 89 codons of exon 2 ( $p = 0.778$  for mean,  $p = 0.012$  for variance), (3) p-distance at the 22 codons showing evidence of positive selection ( $p = 0.694$  for mean,  $p = 0.004$  for variance), and (4) functional distance between alleles using all codons of exon 2 ( $p = 0.922$  for mean,  $p = 0.026$  for variance). The continued lack of evidence for disassortative mating is consistent with the observation that the measures of MHC similarity for the 8,836 possible male-female combinations were highly correlated between the data that were based on single-locus genotype calls and data based on allele lists that included the putative CNV alleles: allele sharing ( $r = 0.9456$ ,  $p < 0.0001$ ), p-distance at all 89 codons ( $r = 0.8955$ ,  $p < 0.0001$ ), p-distance at positively selected codons ( $r = 0.8992$ ,  $p < 0.0001$ ), and functional distance ( $r = 0.8781$ ,  $p < 0.0001$ ). Overall, even if some amount of copy number variation exists, its inclusion has no apparent impact on mate choice patterns in our dataset.

304

306

**Additional Analyses of MHC Mating Patterns**

308 To confirm the results of the permutation tests of MHC-random versus MHC-disassortative mating,  
we used several supplementary analyses beyond those detailed in the main text of the manuscript.  
310 First, in our analysis of p-distances between amino acid sequences of mates' alleles, we used  
additional approaches to choose codons at which variation between alleles might be functionally  
312 important. In addition to using all 89 codons of exon 2 and only the 33 putative peptide binding sites  
as described in the main text, we also analyzed mate choice by examining (a) only the 19 sites that  
314 are most likely to be functionally polymorphic as determined by weak or no clustering on the Gonnet  
PAM 250 matrix (as calculated in Clustal Omega (Sievers *et al.* 2011)), or (b) only the 22 sites that  
316 show evidence of positive selection ( $K_a > K_s$ , as calculated with the Selecton server (Doron-Faigenboim  
*et al.* 2005; Stern *et al.* 2007). However, there was still no evidence of maximally or intermediately  
318 disassortative mating, either at the sites showing individual signature of positive selection ( $p = 0.944$   
for means,  $p = 0.970$  for variances) or the sites at which allelic polymorphisms included marked  
320 differences in the physicochemical properties of the amino acids ( $p = 0.992$  for means,  $p = 0.933$  for  
variances).

322

Second, because the well characterized MHC Class II B of chickens has been shown to include a  
324 dominantly expressed major gene and a poorly expressed minor gene (Jacob *et al.* 2000), we also  
analyzed our two genes separately in case a less-expressed gene might experience less selection and  
326 thus create noise that would obscure a mate choice pattern at the more-expressed gene. We know  
that both genes in storm-petrels are expressed (Dearborn *et al.* 2015), but we do not have data on  
328 whether they are expressed equally. Nonetheless, evidence of random mating still held when looking  
at the two genes individually, based on allele sharing (Ocle-DAB1:  $p = 0.874$  for means,  $p = 0.238$  for  
330 variances; Ocle-DAB2:  $p = 0.832$  for means,  $p = 0.841$  for variances) or amino acid sequence  
divergence (Ocle-DAB1:  $p = 0.832$  for means,  $p = 0.953$  for variances; Ocle-DAB2:  $p = 0.798$  for means,  
332  $p = 0.654$  for variances).

334 Third, we considered the possibility that birds can only detect an allele's presence, and not its  
number of copies, when assessing the MHC alleles of potential mates. To mimic this perspective, we  
336 collapsed each bird's genotype to a simple list of the two or three or four unique alleles of that  
individual's two genes. Note that this parallels the data obtained in studies that simultaneously  
338 amplify multiple loci with a single primer pair. This approach, too, led to a conclusion of random  
mating based on allele sharing ( $p = 0.704$  for means,  $p = 0.692$  for variances) or amino acid sequence  
340 divergence ( $p = 0.634$  for means,  $p = 0.988$  for variances).

342 Thus, all analyses of mating patterns showed random assortment with respect to MHC rather than  
maximally or intermediately disassortative mating.

344

**SUPPLEMENTAL TABLES AND FIGURES**



**Table S1.** Microsatellite variability for 188 adults and 34 offspring at 15 loci, computed with FSTAT 2.9.3.2 (Goudet 2002). To correct for multiple tests,  $p$ -values for  $F_{IS}$  tests should be compared against Bonferroni-adjusted alpha of 0.00333. Loci Ole03 – Ole25 are from (Bicknell *et al.* 2011), Oc63 – Oc87B are from (Sun *et al.* 2009), and TG04-004 is from (Dawson *et al.* 2010).

| Locus    | Motif                      | N birds | N <sub>A</sub> | H <sub>O</sub> | H <sub>E</sub> | $F_{IS}$ | $P$ for H <sub>O</sub> > H <sub>E</sub> | $P$ for H <sub>O</sub> < H <sub>E</sub> |
|----------|----------------------------|---------|----------------|----------------|----------------|----------|-----------------------------------------|-----------------------------------------|
| Ole03    | tetra-nucleotide           | 220     | 22             | 0.882          | 0.887          | 0.006    | 0.671                                   | 0.423                                   |
| Ole05    | penta-nucleotide           | 220     | 17             | 0.796          | 0.798          | 0.003    | 0.585                                   | 0.502                                   |
| Ole07    | di-nucleotide              | 221     | 3              | 0.471          | 0.446          | -0.055   | 0.223                                   | 0.831                                   |
| Ole13    | di-nucleotide              | 221     | 3              | 0.348          | 0.352          | 0.009    | 0.608                                   | 0.476                                   |
| Ole14    | di-nucleotide              | 222     | 3              | 0.527          | 0.541          | 0.026    | 0.741                                   | 0.319                                   |
| Ole17    | di-nucleotide, compound    | 221     | 6              | 0.475          | 0.48           | 0.011    | 0.624                                   | 0.458                                   |
| Ole18    | di-nucleotide              | 221     | 5              | 0.72           | 0.724          | 0.006    | 0.591                                   | 0.475                                   |
| Ole21    | di-/mono-/tetra-nucleotide | 221     | 40             | 0.946          | 0.944          | -0.002   | 0.516                                   | 0.596                                   |
| Ole22    | di-nucleotide              | 221     | 3              | 0.353          | 0.343          | -0.03    | 0.348                                   | 0.733                                   |
| Ole23    | di-nucleotide              | 222     | 13             | 0.865          | 0.872          | 0.008    | 0.66                                    | 0.42                                    |
| Ole24    | tetra-nucleotide           | 221     | 8              | 0.769          | 0.764          | -0.007   | 0.481                                   | 0.586                                   |
| Ole25    | tetra-nucleotide, compound | 221     | 7              | 0.787          | 0.808          | 0.026    | 0.804                                   | 0.241                                   |
| Oc63     | di-nucleotide              | 215     | 6              | 0.633          | 0.645          | 0.02     | 0.674                                   | 0.376                                   |
| Oc87B    | di-nucleotide              | 221     | 9              | 0.769          | 0.759          | -0.014   | 0.361                                   | 0.703                                   |
| TG04-004 | di-nucleotide, compound    | 221     | 5              | 0.615          | 0.655          | 0.06     | 0.926                                   | 0.096                                   |

N<sub>A</sub> = number of alleles, H<sub>O</sub> = observed heterozygosity, H<sub>E</sub> = expected heterozygosity

**Table S2.** Clustal Omega (1.2.1) amino acid alignment of exon 2 alleles at Locus 1 and Locus 2, with allele frequencies from 188 adults. Alleles reported here for the first time – i.e. not found in (Dearborn *et al.* 2015) – are marked with +. Note that in both loci there are alleles with a 3-bp deletion at codon 73. Codons at putative peptide binding sites are shaded in gray.

| <b>Ocle-DAB1</b> |       | 5                                                                                                                 | 10                    | 15                               | 20             | 25             | 30                   | 35             | 40             | 45             | 50             | 55             | 60             | 65             | 70             | 75             | 80             | 85             |                |
|------------------|-------|-------------------------------------------------------------------------------------------------------------------|-----------------------|----------------------------------|----------------|----------------|----------------------|----------------|----------------|----------------|----------------|----------------|----------------|----------------|----------------|----------------|----------------|----------------|----------------|
| Allele           | Freq  | ..... ..... ..... ..... ..... ..... ..... ..... ..... ..... ..... ..... ..... ..... ..... ..... ..... ..... ..... |                       |                                  |                |                |                      |                |                |                |                |                |                |                |                |                |                |                |                |
| 004              | 0.431 | FFQDMFKAECYFTNGT                                                                                                  | ERVLLARYIYNRQ         | QDVHFDSDVGF                      | VADTPLGEPDAKY  | WNSQPDLL       | EDRRASVDTFC          | CRHNYGVWTP     | PFTV           | ERR            |                |                |                |                |                |                |                |                |                |
| 028              | 0.152 | Y..E.....                                                                                                         | .....F.D.....         | .....RA.....                     | .....Y.....    | .....S.....    | .....I..RK.....      | .....          | .....          | .....          | .....          | .....          | .....          | .....          | .....          | .....          | .....          | .....          | .....K         |
| 055              | 0.141 | ...E.....                                                                                                         | .....F.D.....         | .....RA.....                     | .....Y.....    | .....S.....    | .....I..E.A.....     | .....          | .....          | .....          | .....          | .....          | .....          | .....          | .....          | .....          | .....          | .....          | .....          |
| 080              | 0.080 | Y..E.....                                                                                                         | .....F.D.....         | .....F.....                      | .....Y.....    | .....S.....    | .....I..RK.....      | .....          | .....          | .....          | .....          | .....          | .....          | .....          | .....          | .....          | .....          | .....          | .....K         |
| 113              | 0.066 | Y..E.....                                                                                                         | .....K..F.D.....      | .....RA.....                     | .....Y.....    | .....S.....    | .....I..RK.....      | .....          | .....          | .....          | .....          | .....          | .....          | .....          | .....          | .....          | .....          | .....          | .....K         |
| 090              | 0.048 | Y.....                                                                                                            | .....F.D.....         | .....F.....                      | .....Y.....    | .....S.....    | .....I..E.A.....     | .....          | .....          | .....          | .....          | .....          | .....          | .....          | .....          | .....          | .....          | .....          | .....K         |
| 079              | 0.043 | Y..E..S.....                                                                                                      | .....Q..HVT.....      | .....H..F.....                   | .....Y.....    | .....I..D..... | .....AI..QT..EM..... | .....          | .....          | .....          | .....          | .....          | .....          | .....          | .....          | .....          | .....          | .....          | .....          |
| 060              | 0.021 | Y..E.....                                                                                                         | .....F.D.....         | .....RA.....                     | .....Y.....    | .....S.....    | .....I..RK.....      | .....          | .....          | .....          | .....          | .....          | .....          | .....          | .....          | .....          | .....          | .....          | .....K         |
| 149              | 0.011 | .....                                                                                                             | .....                 | .....                            | .....          | .....          | .....                | .....          | .....          | .....          | .....          | .....          | .....          | .....          | .....          | .....          | .....          | .....          | .....          |
| + 428            | 0.005 | Y..E.....                                                                                                         | .....F.D.....         | .....RA.....                     | .....Y.....    | .....S.....    | .....I..RK.....      | .....          | .....          | .....          | .....          | .....          | .....          | .....          | .....          | .....          | .....          | .....          | .....K         |
| + 644            | 0.003 | ...E.....                                                                                                         | .....F.D.....         | .....RA.....                     | .....Y.....    | .....S.....    | .....I..E.A.....     | .....          | .....          | .....          | .....          | .....          | .....          | .....          | .....          | .....          | .....          | .....          | .....K         |
|                  |       | :**:*:**:*****:***                                                                                                | : **:*:**:*****:***** | ** ***** :** ** :** *****:*****: |                |                |                      |                |                |                |                |                |                |                |                |                |                |                |                |
| <b>Ocle-DAB2</b> |       | 5                                                                                                                 | 10                    | 15                               | 20             | 25             | 30                   | 35             | 40             | 45             | 50             | 55             | 60             | 65             | 70             | 75             | 80             | 85             |                |
| Allele           | Freq  | ..... ..... ..... ..... ..... ..... ..... ..... ..... ..... ..... ..... ..... ..... ..... ..... ..... ..... ..... |                       |                                  |                |                |                      |                |                |                |                |                |                |                |                |                |                |                |                |
| 0050             | 0.569 | FFQWIGKAECQYLNG                                                                                                   | TERVRLLVRYIHN         | RQQFVHFDSDV                      | GFYVADTPLGEP   | DAKYWNSQPD     | LLEQORRAEVD          | TYCRHNYGV      | STPFIV         | ERR            |                |                |                |                |                |                |                |                |                |
| 0054             | 0.125 | V..RMF.....                                                                                                       | .....A.S.Y.....       | .....                            | .....          | .....          | .....                | .....          | .....          | .....          | .....          | .....          | .....          | .....          | .....          | .....          | .....          | .....          | .....          |
| 0131             | 0.096 | V..RMF.....                                                                                                       | .....Y.A.S.Y.....     | .....                            | .....          | .....          | .....                | .....          | .....          | .....          | .....          | .....          | .....          | .....          | .....          | .....          | .....          | .....          | .....          |
| 0074             | 0.061 | ...EMF.....                                                                                                       | .....A.S.Y.....       | .....                            | .....          | .....          | .....                | .....          | .....          | .....          | .....          | .....          | .....          | .....          | .....          | .....          | .....          | .....          | .....K         |
| 0176             | 0.048 | V..EM.....                                                                                                        | .....H.F.....         | .....A.S.Y.....                  | .....          | .....          | .....                | .....          | .....          | .....          | .....          | .....          | .....          | .....          | .....          | .....          | .....          | .....          | .....          |
| 0539             | 0.035 | .....                                                                                                             | .....                 | .....                            | .....          | .....          | .....                | .....          | .....          | .....          | .....          | .....          | .....          | .....          | .....          | .....          | .....          | .....          | .....          |
| 0046             | 0.019 | V.....                                                                                                            | .....                 | .....                            | .....          | .....          | .....                | .....          | .....          | .....          | .....          | .....          | .....          | .....          | .....          | .....          | .....          | .....          | .....          |
| 0193             | 0.016 | V..RMF.....                                                                                                       | .....A.S.Y.....       | .....                            | .....          | .....          | .....                | .....          | .....          | .....          | .....          | .....          | .....          | .....          | .....          | .....          | .....          | .....          | .....          |
| 1158             | 0.016 | V..EM.....                                                                                                        | .....H.F.....         | .....F.D..Y..D.....              | .....          | .....          | .....                | .....          | .....          | .....          | .....          | .....          | .....          | .....          | .....          | .....          | .....          | .....          | .....          |
| 0249             | 0.008 | ...EMF.....                                                                                                       | .....A.S.Y.....       | .....                            | .....          | .....          | .....                | .....          | .....          | .....          | .....          | .....          | .....          | .....          | .....          | .....          | .....          | .....          | .....          |
| 0791             | 0.003 | ...EMF.....                                                                                                       | .....A.S.Y.....       | .....                            | .....          | .....          | .....                | .....          | .....          | .....          | .....          | .....          | .....          | .....          | .....          | .....          | .....          | .....          | .....          |
| 1553             | 0.003 | .....                                                                                                             | .....                 | .....                            | .....          | .....          | .....                | .....          | .....          | .....          | .....          | .....          | .....          | .....          | .....          | .....          | .....          | .....          | .....          |
| + 0132           | 0.003 | V..EM..S..H.F.....                                                                                                | .....F.D..Y..RA.....  | .....F.....                      | .....          | .....          | .....                | .....          | .....          | .....          | .....          | .....          | .....          | .....          | .....          | .....          | .....          | .....          | .....          |
|                  |       | .** : **:*:**:*****                                                                                               | ** * * :*****         | .*****:*****                     | ** *****:***** | ** *****:***** | ** *****:*****       | ** *****:***** | ** *****:***** | ** *****:***** | ** *****:***** | ** *****:***** | ** *****:***** | ** *****:***** | ** *****:***** | ** *****:***** | ** *****:***** | ** *****:***** | ** *****:***** |

\* = fully conserved residue at that locus  
 : = conservation between groups of strongly similar properties, scoring > 0.5 in Gonnet PAM 250 matrix  
 . = conservation between groups of weakly similar properties, scoring ≤ 0.5 in Gonnet PAM 250 matrix.

**Figure S1.** Illustration of the phylogeny permutation model. Yellow = Ocle-DAB1 alleles; dark blue = Ocle-DAB2 alleles.

a) Original DNA network.

b) Alleles (and their associated frequencies) detached from original locations and ready for permutation.

c) Four of the  $6.204 \times 10^{23}$  possible permutations of the 24 alleles within the phylogeny. The four examples illustrate low versus high values of monophyly and small versus large distance between the two most common alleles of Ocle-DAB1 and Ocle-DAB2.

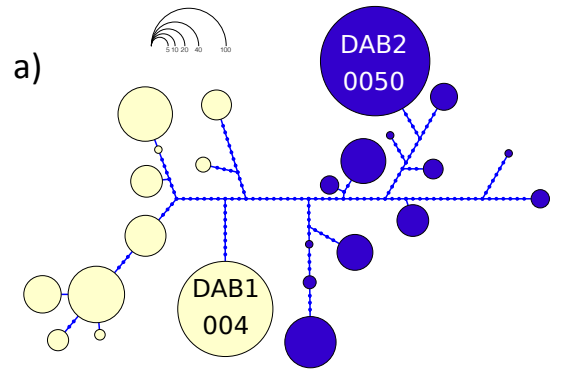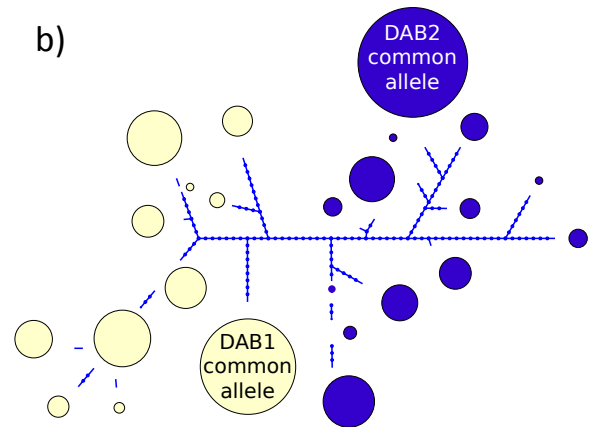

c) **Small Distance**  
Between Common Alleles

**Large Distance**  
Between Common Alleles

Low Monophyly

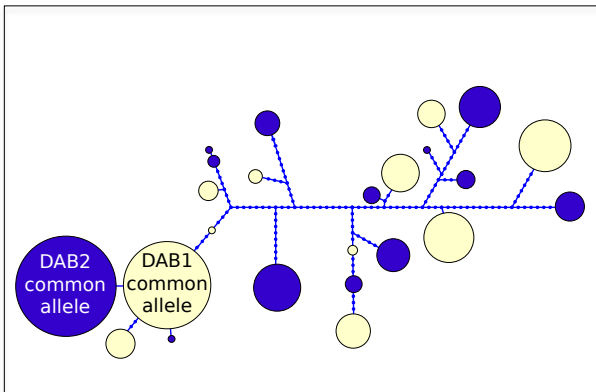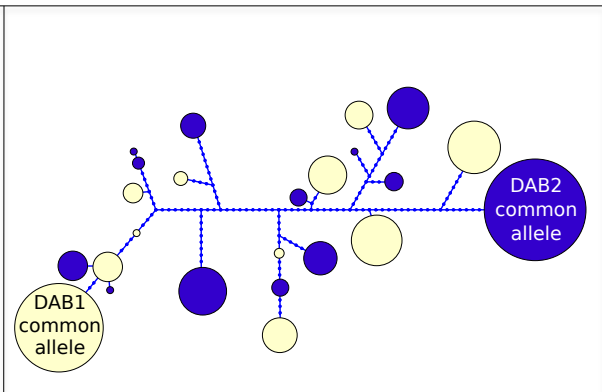

High Monophyly

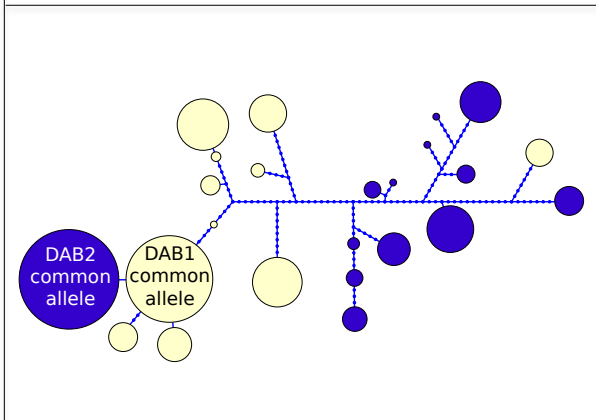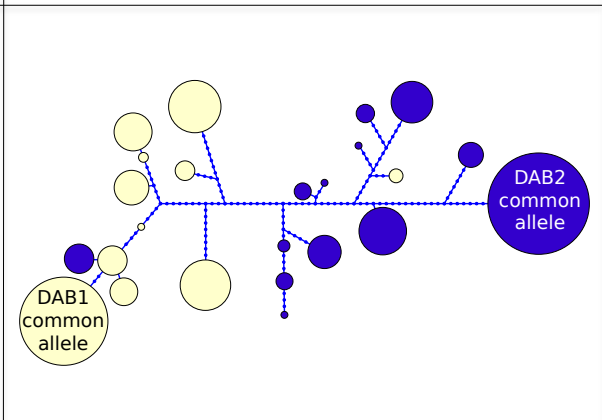

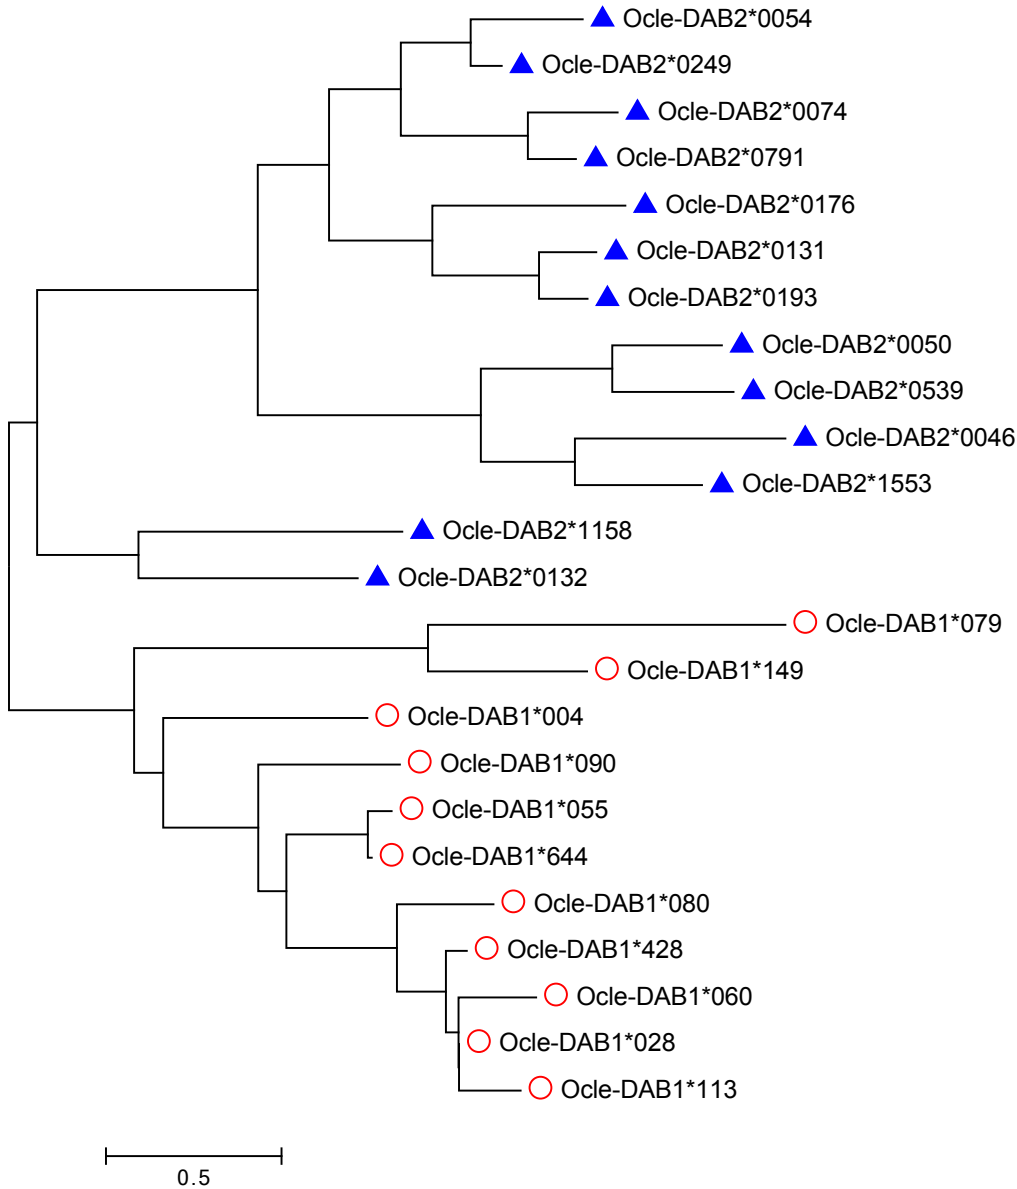

**Figure S2.** Monophyly based on functional distance between alleles. Neighbor Joining tree was made from a distance matrix of functional divergence between exon 2 alleles, based on physicochemical properties of amino acid polymorphisms. Alleles are marked with open circles for Ocle-DAB1 and solid triangles for Ocle-DAB2.

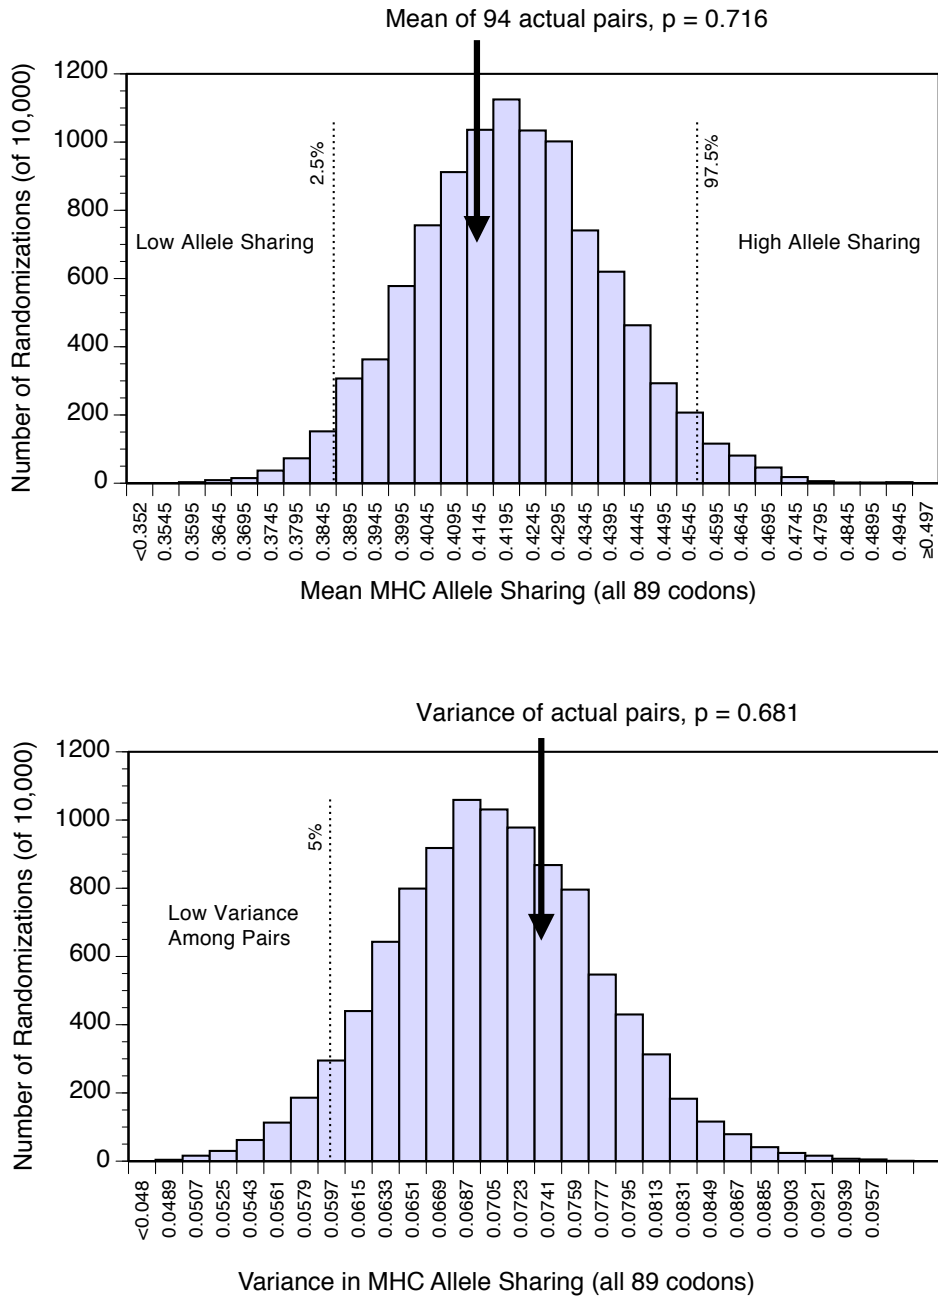

**Figure S3.** Allele sharing between actual mates ( $n=94$  pairs) and randomized mates at two MHC Class II B loci, using all 89 codons of exon 2. Distribution from 10,000 permutations is shown in shaded bars; value from actual pairs is shown with arrow.

- (a) Mean of mated pairs.
- (b) Variance among mated pairs.

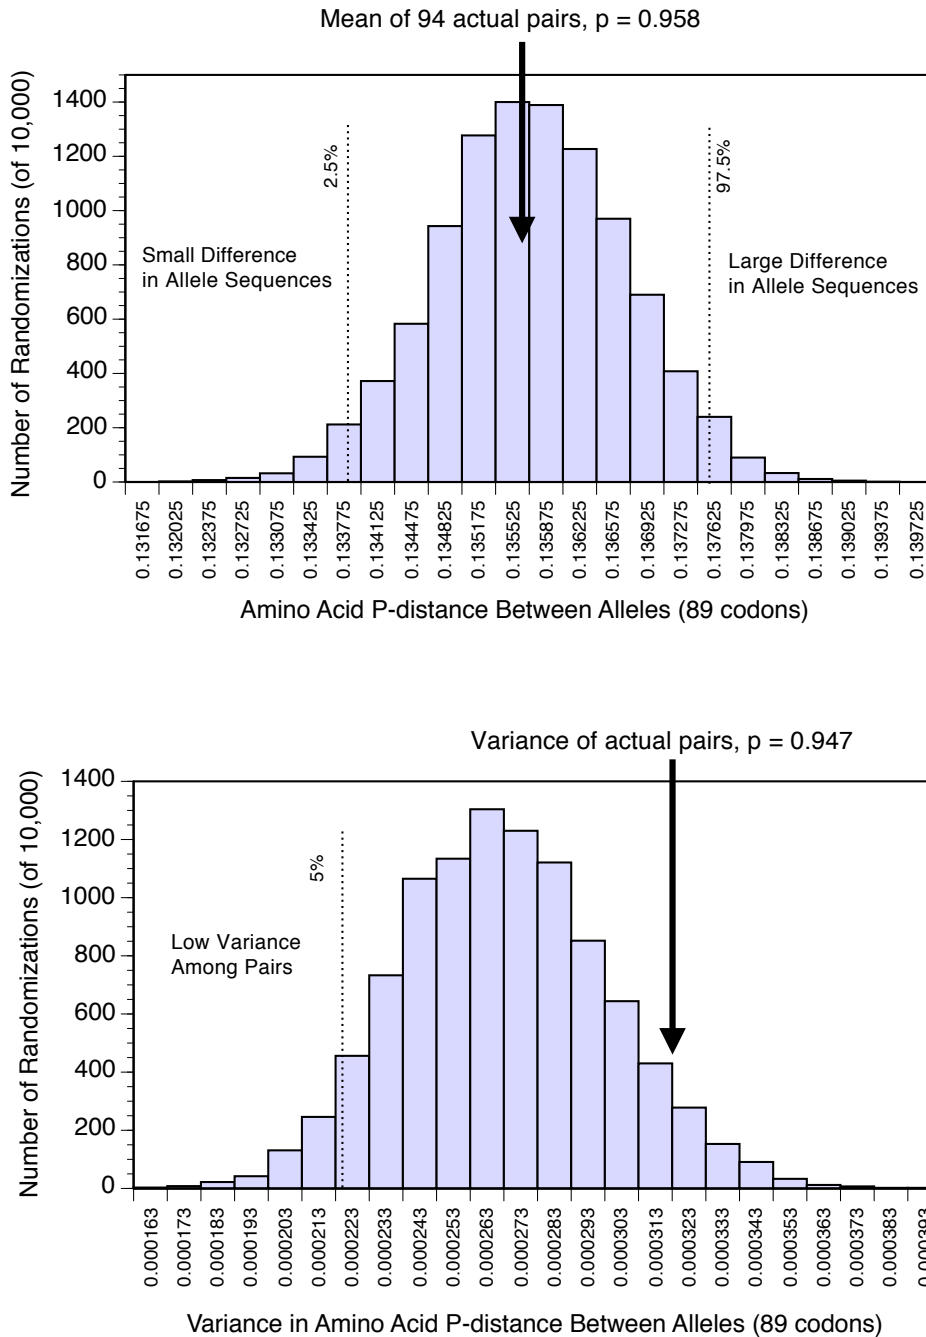

**Figure S4.** Amino acid sequence p-distances between pairwise comparisons of mates' alleles from two MHC Class II B genes, using all 89 codons of exon 2 from 94 mated pairs. Distribution from 10,000 permutations is shown in shaded bars; value from actual pairs is shown with arrow.

- (a) Mean of mated pairs.
- (b) Variance among mated pairs.

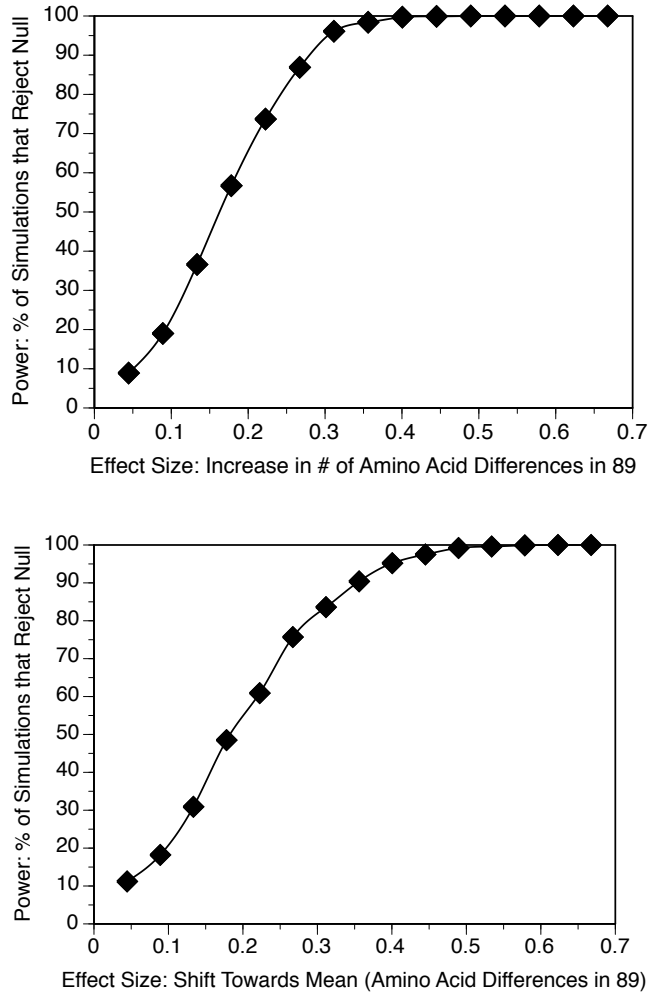

**Figure S5.** Power analysis of randomization tests of MHC-disassortative mating preferences.

(a) Power to detect different degrees of maximally disassortative mating, where effect size is the amount of disassortative shift applied to randomly assigned pairings of each female with a male. The shift towards disassortative preference is measured as the increase in average number of amino acid differences between mates' 89-codon exon 2 sequences, relative to strictly random mating.

(b) Power to detect different degrees of intermediately disassortative mating, where effect size is the average number of amino acids (in 89 codons) by which MHC divergence of randomly assigned pairs is shifted inward towards the overall mean of random matings.

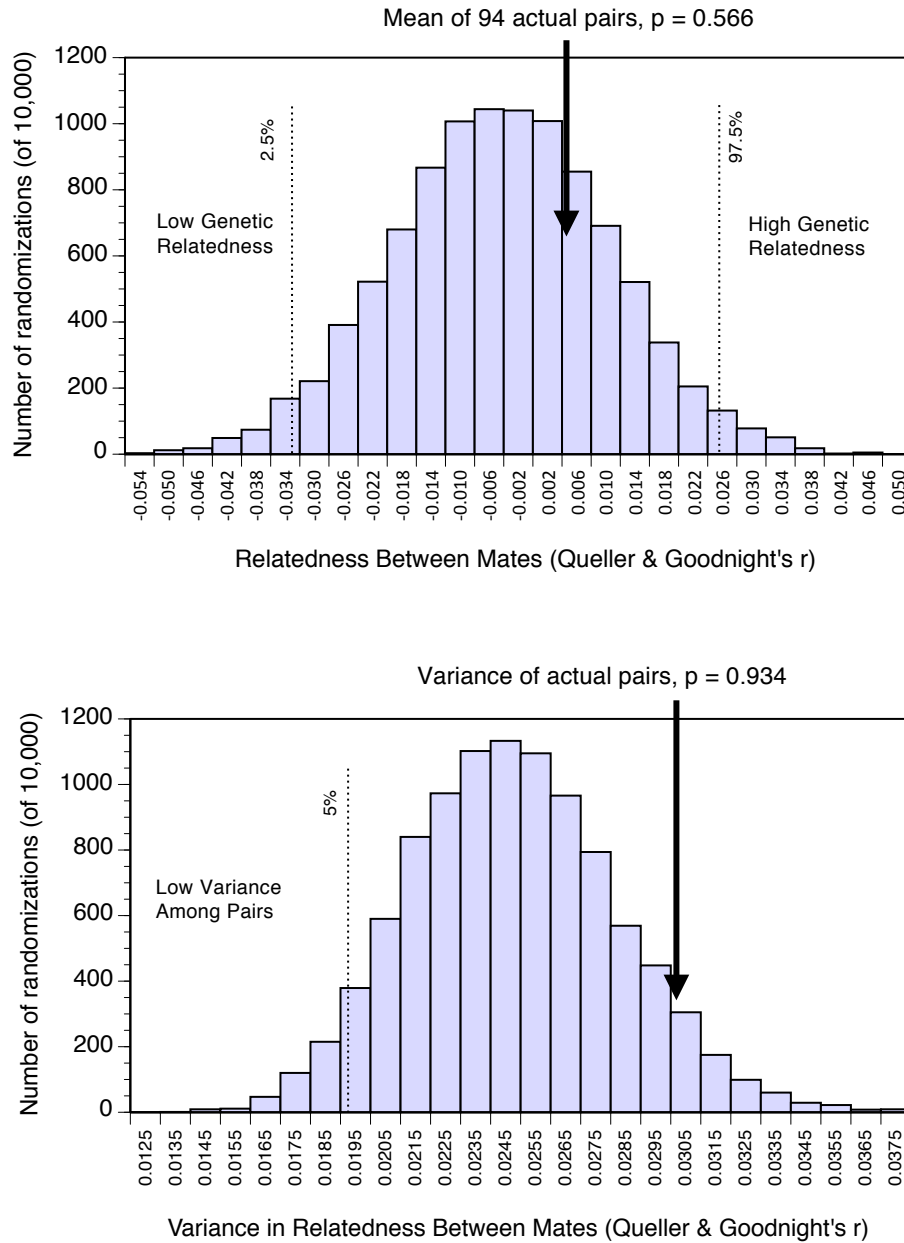

**Figure S6.** Absence of inbreeding or outbreeding, based on Queller and Goodnight's relatedness coefficient between mates calculated from 15 microsatellite loci. Distribution from 10,000 permutations is shown in shaded bars; value from actual mates ( $n=94$  pairs) is shown with arrow. (a) Mean of mated pairs. (b) Variance among mated pairs. Similar results were obtained using Moran's  $I$  as a relatedness estimator.



## REFERENCES

- Aeschlimann PB, Häberli MA, Reusch TBH, Boehm T, Milinski M (2003) Female sticklebacks *Gasterosteus aculeatus* use self-reference to optimize MHC allele number during mate selection. *Behavioral Ecology and Sociobiology* **54**, 119-126.
- Agbali M, Reichard M, Bryjová A, Bryja J, Smith C (2010) Mate choice for nonadditive genetic benefits correlate with mhc dissimilarity in the rose bitterling (*Rhodeus ocellatus*). *Evolution* **64**, 1683-1696.
- Bahr A, Sommer S, Mattle B, Wilson AB (2012) Mutual mate choice in the potbellied seahorse (*Hippocampus abdominalis*). *Behavioral Ecology* **23**, 869-878.
- Baratti M, Dessì-Fulgheri F, Ambrosini R, et al. (2012) MHC genotype predicts mate choice in the ring-necked pheasant *Phasianus colchicus*. *Journal of Evolutionary Biology* **25**, 1531-1542.
- Bichet C, Penn DJ, Moodley Y, et al. (2014) Females tend to prefer genetically similar mates in an island population of house sparrows. *BMC Evolutionary Biology* **14**.
- Bicknell AWJ, Dawson DA, Horsburgh GJ, et al. (2011) Characterisation and predicted genome locations of Leach's storm-petrel (*Oceanodroma leucorhoa*) microsatellite loci (Procellariidae, Aves). *Conservation Genetics Resources* **3**, 711-716.
- Bonneaud C, Chastel O, Federici P, Westerdahl H, Sorci G (2006) Complex Mhc-based mate choice in a wild passerine. *Proceedings of the Royal Society B-Biological Sciences* **273**, 1111-1116.
- Bos DH, Williams RN, Gopurenko D, Bulut Z, Dewoody JA (2009) Condition-dependent mate choice and a reproductive disadvantage for MHC-divergent male tiger salamanders. *Molecular Ecology* **18**, 3307-3315.
- Cutrera AP, Fanjul MS, Zenuto RR (2012) Females prefer good genes: MHC-associated mate choice in wild and captive tuco-tucos. *Animal Behaviour* **83**, 847-856.
- Dawson DA, Horsburgh GJ, Küpper C, et al. (2010) New methods to identify conserved microsatellite loci and develop primer sets of high cross-species utility - as demonstrated for birds. *Molecular Ecology Resources* **10**, 475-494.
- Dearborn DC, Gager AB, Gilmour ME, et al. (2015) Non-neutral evolution and reciprocal monophyly of two expressed Mhc class II B genes in Leach's storm-petrel. *Immunogenetics* **67**, 111-123.
- Doron-Faigenboim A, Stern A, Mayrose I, Bacharach E, Pupko T (2005) Selection: A server for detecting evolutionary forces at a single amino-acid site. *Bioinformatics* **21**, 2101-2103.
- Eizaguirre C, Yeates SE, Lenz TL, Kalbe M, Milinski M (2009) MHC-based mate choice combines good genes and maintenance of MHC polymorphism. *Molecular Ecology* **18**, 3316-3329.
- Ekblom R, Saether SA, Grahn M, et al. (2004) Major histocompatibility complex variation and mate choice in a lekking bird, the great snipe (*Gallinago media*). *Molecular Ecology* **13**, 3821-3828.
- Evans ML, Dionne M, Miller KM, Bernatchez L (2012) Mate choice for major histocompatibility complex genetic divergence as a bet-hedging strategy in the atlantic salmon (*Salmo salar*). *Proceedings of the Royal Society B: Biological Sciences* **279**, 379-386.
- Evans ML, Neff BD, Heath DD (2013) Behavioural and genetic analyses of mate choice and reproductive success in two Chinook salmon populations. *Canadian Journal of Fisheries and Aquatic Sciences* **70**, 263-270.
- Forsberg LA, Dannewitz J, Petersson E, Grahn M (2007) Influence of genetic dissimilarity in the reproductive success and mate choice of brown trout - Females fishing for optimal MHC dissimilarity. *Journal of Evolutionary Biology* **20**, 1859-1869.

- Freeman-Gallant CR, Meguerdichian M, Wheelwright NT, Sollecito SV (2003) Social pairing and female mating fidelity predicted by restriction fragment length polymorphism similarity at the major histocompatibility complex in a songbird. *Molecular Ecology* **12**, 3077-3083.
- Fridolfsson A-K, Ellegren H (1999) A simple and universal method for molecular sexing of non-ratite birds. *Journal of Avian Biology* **30**, 116-121.
- Gillingham MAF, Richardson DS, Løvlie H, *et al.* (2009) Cryptic preference for MHC-dissimilar females in male red junglefowl, *Gallus gallus*. *Proceedings of the Royal Society B: Biological Sciences* **276**, 1083-1092.
- Goudet J (2002) FSTAT, a program to estimate and test gene diversities and fixation indices. <http://www2.unil.ch/popgen/softwares/fstat.htm>
- Gu X, Nei M (1999) Locus specificity of polymorphic alleles and evolution by a birth-and death process in mammalian MHC genes. *Molecular Biology and Evolution* **16**, 147-156.
- Hardy OJ, Vekemans X (1999) Isolation by distance in a continuous population: Reconciliation between spatial autocorrelation analysis and population genetics models. *Heredity* **83**, 145-154.
- Havlicek J, Roberts SC (2009) MHC-correlated mate choice in humans: A review. *Psychoneuroendocrinology* **34**, 497-512.
- Huchard E, Baniel A, Schliehe-Diecks S, Kappeler PM (2013) MHC-disassortative mate choice and inbreeding avoidance in a solitary primate. *Molecular Ecology* **22**, 4071-4086.
- Huchard E, Knapp LA, Wang J, Raymond M, Cowlshaw G (2010) MHC, mate choice and heterozygote advantage in a wild social primate. *Molecular Ecology* **19**, 2545-2561.
- Jacob JP, Milne S, Beck S, Kaufman J (2000) The major and a minor class II  $\beta$  chain (B-LB) gene flank the Tapasin gene in the B-F/B-L region of the chicken major histocompatibility complex. *Immunogenetics* **51**, 138-147.
- Jordan WC, Bruford MW (1998) New perspectives on mate choice and the MHC. *Heredity* **81**, 127-133.
- Juola FA, Dearborn DC (2012) Sequence-based evidence for major histocompatibility complex-disassortative mating in a colonial seabird. *Proceedings of the Royal Society B: Biological Sciences* **279**, 153-162.
- Kalbe M, Eizaguirre C, Dankert I, *et al.* (2009) Lifetime reproductive success is maximized with optimal major histocompatibility complex diversity. *Proceedings of the Royal Society B: Biological Sciences* **276**, 925-934.
- Kaufman J, Milne S, Göbel TWF, *et al.* (1999) The chicken B locus is a minimal essential major histocompatibility complex. *Nature* **401**, 923-925.
- Knafler GJ, Clark JA, Boersma PD, Bouzat JL (2012) MHC diversity and mate choice in the magellanic penguin, *Spheniscus magellanicus*. *Journal of Heredity* **103**, 759-768.
- Kuduk K, Babik W, Bellemain E, *et al.* (2014) No evidence for the effect of MHC on male mating success in the brown bear. *Plos One* **9**.
- Landry C, Garant D, Duchesne P, Bernatchez L (2001) 'Good genes as heterozygosity': The major histocompatibility complex and mate choice in Atlantic salmon (*Salmo salar*). *Proceedings of the Royal Society B: Biological Sciences* **268**, 1279-1285.
- Lenz TL, Mueller B, Trillmich F, Wolf JB (2013) Divergent allele advantage at MHC-DRB through direct and maternal genotypic effects and its consequences for allele pool composition and mating. *Proceedings. Biological sciences / The Royal Society* **280**, 20130714.

- Løvlie H, Gillingham MA, Worley K, Pizzari T, Richardson DS (2013) Cryptic female choice favours sperm from major histocompatibility complex-dissimilar males. *Proceedings. Biological sciences / The Royal Society* **280**, 20131296.
- McCairns RJS, Bourget S, Bernatchez L (2011) Putative causes and consequences of MHC variation within and between locally adapted stickleback demes. *Molecular Ecology* **20**, 486-502.
- Miller HC, Moore JA, Nelson NJ, Daugherty CH (2009) Influence of major histocompatibility complex genotype on mating success in a free-ranging reptile population. *Proceedings of the Royal Society B: Biological Sciences* **276**, 1695-1704.
- Neff BD, Garner SR, Heath JW, Heath DD (2008) The MHC and non-random mating in a captive population of Chinook salmon. *Heredity* **101**, 175-185.
- Olsson M, Madsen T, Nordby J, *et al.* (2003) Major histocompatibility complex and mate choice in sand lizards. *Proceedings of the Royal Society B: Biological Sciences* **270**.
- Penn D, Potts W (1998) MHC-disassortative mating preferences reversed by cross-fostering. *Proceedings of the Royal Society, Series B: Biological Sciences* **265**, 1299-1306.
- Piertney SB, Oliver MK (2006) The evolutionary ecology of the major histocompatibility complex. *Heredity* **96**, 7-21.
- Radwan J, Tkacz A, Kloch A (2008) MHC and preferences for male odour in the bank vole. *Ethology* **114**, 827-833.
- Reusch TBH, Häberli MA, Aeschlimann PB, Milinski M (2001) Female sticklebacks count alleles in a strategy of sexual selection explaining MHC polymorphism. *Nature* **414**, 300-302.
- Richardson DS, Komdeur J, Burke T, von Schantz T (2005) MHC-based patterns of social and extra-pair mate choice in the Seychelles warbler. *Proceedings of the Royal Society B-Biological Sciences* **272**, 759-767.
- Roth O, Sundin J, Berglund A, Rosenqvist G, Wegner KM (2014) Male mate choice relies on major histocompatibility complex class I in a sex-role-reversed pipefish. *Journal of Evolutionary Biology* **27**, 929-938.
- Salomonsen J, Sørensen MR, Marston DA, *et al.* (2005) Two CD1 genes map to the chicken MHC, indicating that CD1 genes are ancient and likely to have been present in the primordial MHC. *Proceedings of the National Academy of Sciences of the United States of America* **102**, 8668-8673.
- Schwensow N, Eberle M, Sommer S (2008a) Compatibility counts: MHC-associated mate choice in a wild promiscuous primate. *Proceedings of the Royal Society B: Biological Sciences* **275**, 555-564.
- Schwensow N, Fietz J, Dausmann K, Sommer S (2008b) MHC-associated mating strategies and the importance of overall genetic diversity in an obligate pair-living primate. *Evolutionary Ecology* **22**, 617-636.
- Sepil I, Radersma R, Santure AW, *et al.* (2015) No evidence for MHC class I-based disassortative mating in a wild population of great tits. *Journal of Evolutionary Biology* **28**, 642-654.
- Setchell JM, Charpentier MJE, Abbott KM, Wickings EJ, Knapp LA (2010) Opposites attract: MHC-associated mate choice in a polygynous primate. *Journal of Evolutionary Biology* **23**, 136-148.
- Sievers F, Wilm A, Dineen D, *et al.* (2011) Fast, scalable generation of high-quality protein multiple sequence alignments using Clustal Omega. *Molecular Systems Biology* **7**.
- Sin YW, Annavi G, Newman C, *et al.* (2015) MHC class II-assortative mate choice in European badgers (*Meles meles*). *Molecular Ecology* **24**, 3138-3150.

- Sommer S (2005) Major histocompatibility complex and mate choice in a monogamous rodent. *Behavioral Ecology and Sociobiology* **58**, 181-189.
- Stern A, Doron-Faigenboim A, Erez E, *et al.* (2007) Selecton 2007: Advanced models for detecting positive and purifying selection using a Bayesian inference approach. *Nucleic Acids Research* **35**, W506-W511.
- Strandh M, Westerdahl H, Pontarp M, *et al.* (2012) Major histocompatibility complex class II compatibility, but not class I, predicts mate choice in a bird with highly developed olfaction. *Proceedings of the Royal Society B: Biological Sciences* **279**, 4457-4463.
- Sun Z, Gómez-Díaz E, Bailie A, Friesen V (2009) Isolation and characterization of microsatellite loci for storm-petrels. *Molecular Ecology Resources* **9**, 913-915.
- Westerdahl H (2004) No evidence of an MHC-based female mating preference in great reed warblers. *Molecular Ecology* **13**, 2465-2470.
- Winternitz JC, Promerova M, Polakova R, *et al.* (2015) Effects of heterozygosity and MHC diversity on patterns of extra-pair paternity in the socially monogamous scarlet rosefinch. *Behavioral Ecology and Sociobiology* **69**, 459-469.
- Worley K, Gillingham M, Jensen P, *et al.* (2008) Single locus typing of MHC class I and class II B loci in a population of red jungle fowl. *Immunogenetics* **60**, 233-247.
- Yeates SE, Einum S, Fleming IA, *et al.* (2009) Atlantic salmon eggs favour sperm in competition that have similar major histocompatibility alleles. *Proceedings of the Royal Society B: Biological Sciences* **276**, 559-566.
